# Supplementary material for: Ag(i)-mediated self-assembly of anisotropic rods and plates in the surfactant mixture of CTAB and Pluronics
Source: RSC Adv. 2019 Feb 5;9(8):4380–9. doi: 10.1039/c8ra10517k (PMC9060553; doi:10.1039/c8ra10517k)
Supplement: RA-009-C8RA10517K-s001 [file RA-009-C8RA10517K-s001.pdf]

**Electronic Supplementary Information (ESI)**

**Ag(I)-Mediated Self-Assembly of Anisotropic  
Rods and Plates in the Surfactant Mixture of  
CTAB and Pluronics**

*Hyon-Min Song<sup>†,\*</sup> and Jeffrey I. Zink<sup>‡</sup>*

<sup>†</sup>Department of Chemistry, Dong-A University, Busan 604-714, South Korea

<sup>‡</sup>Department of Chemistry and Biochemistry, University of California, Los Angeles, Los Angeles, California 90095-1569, USA

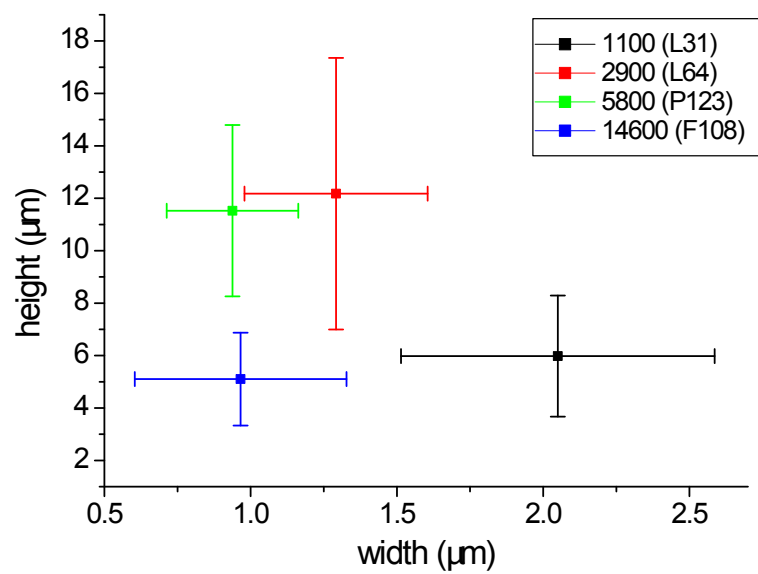

**Fig. S1** Dimension with the error bars of the rods that are prepared with Pluronic (17.9%)

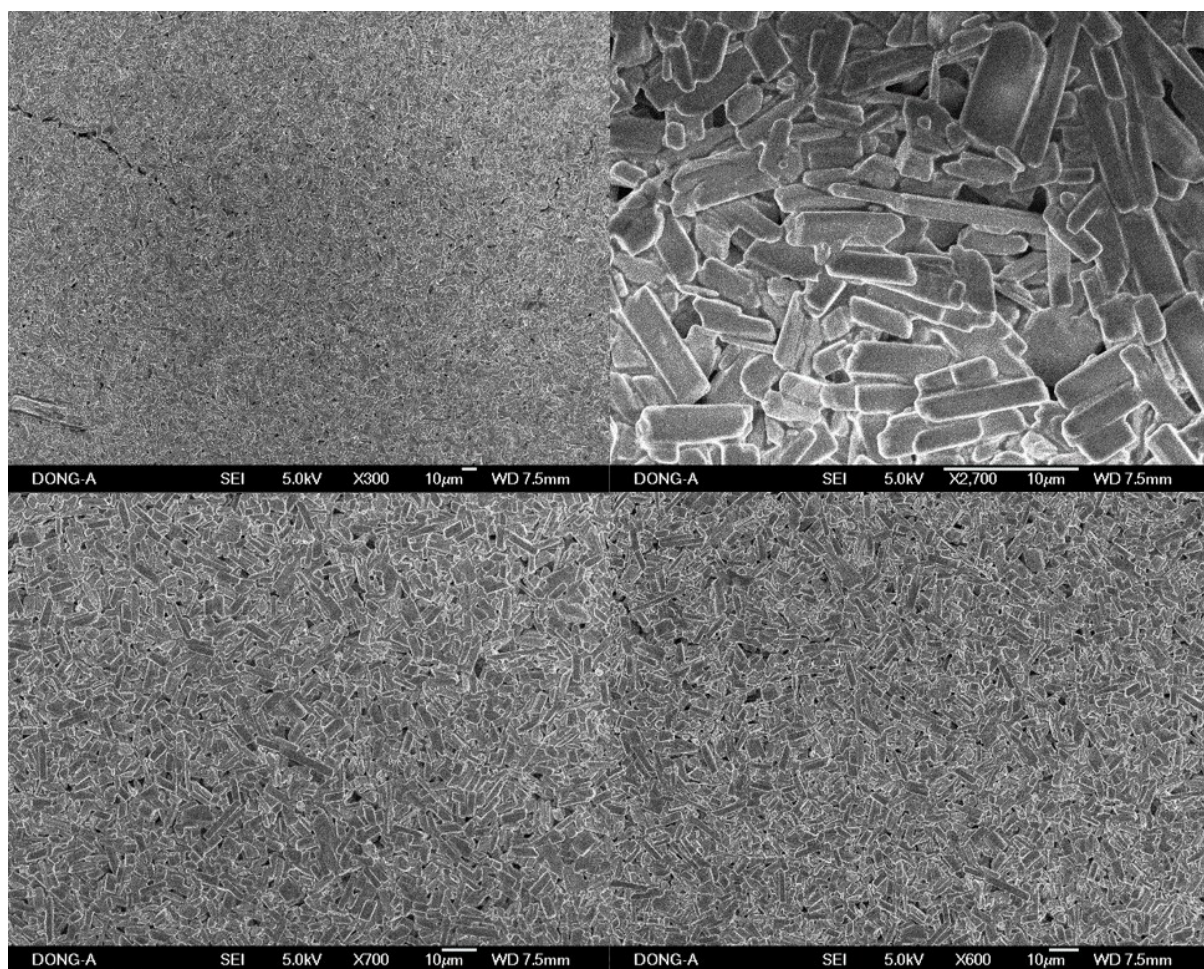

**Fig. S2** SEM images of different magnification of the self-assembled rods prepared with Pluronic L-31 copolymers (17.9% aqueous,  $M_n \sim 1,100$ ).

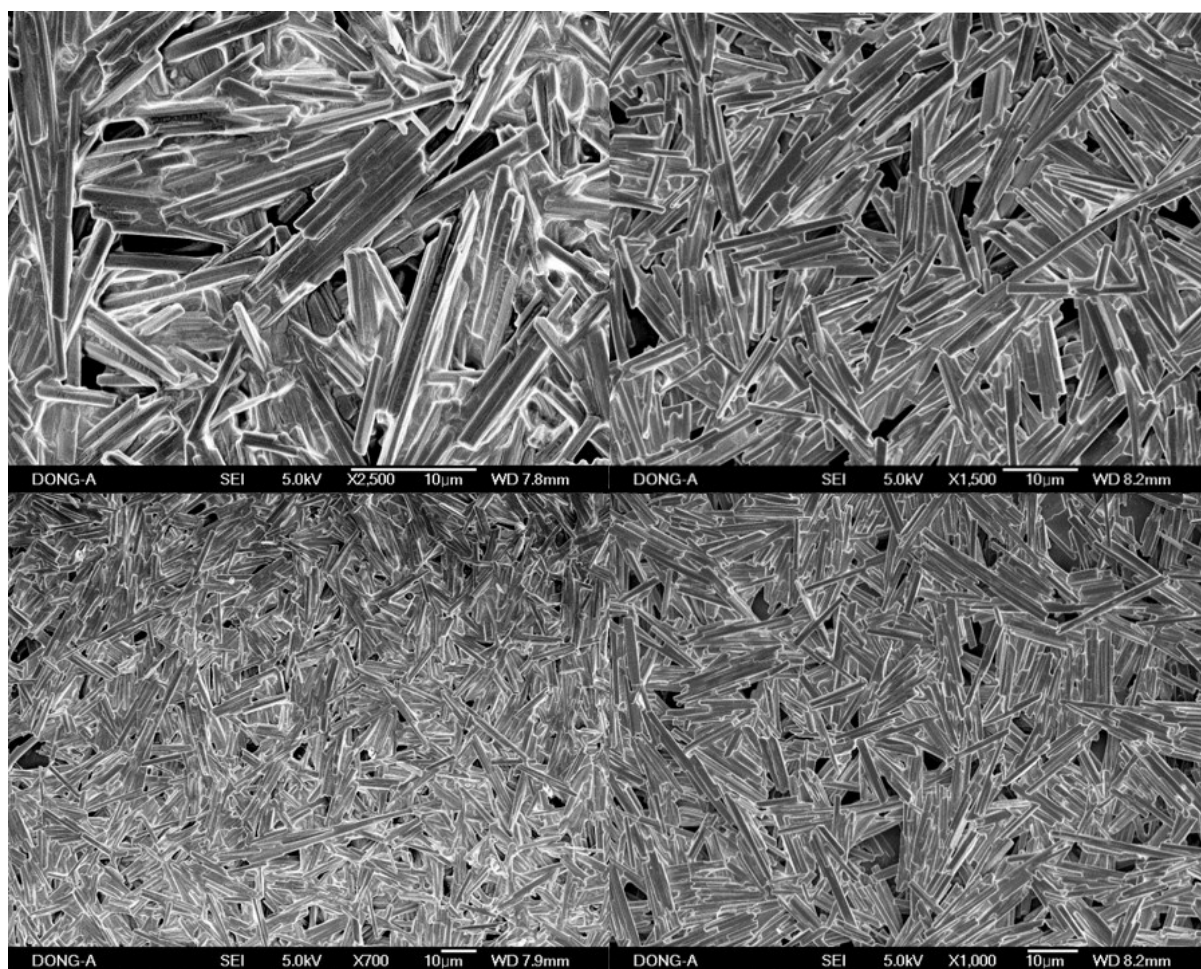

**Fig. S3** SEM images of different magnification of the self-assembled rods prepared with Pluronic L-64 copolymers (17.9% aqueous,  $M_n \sim 2,900$ ).

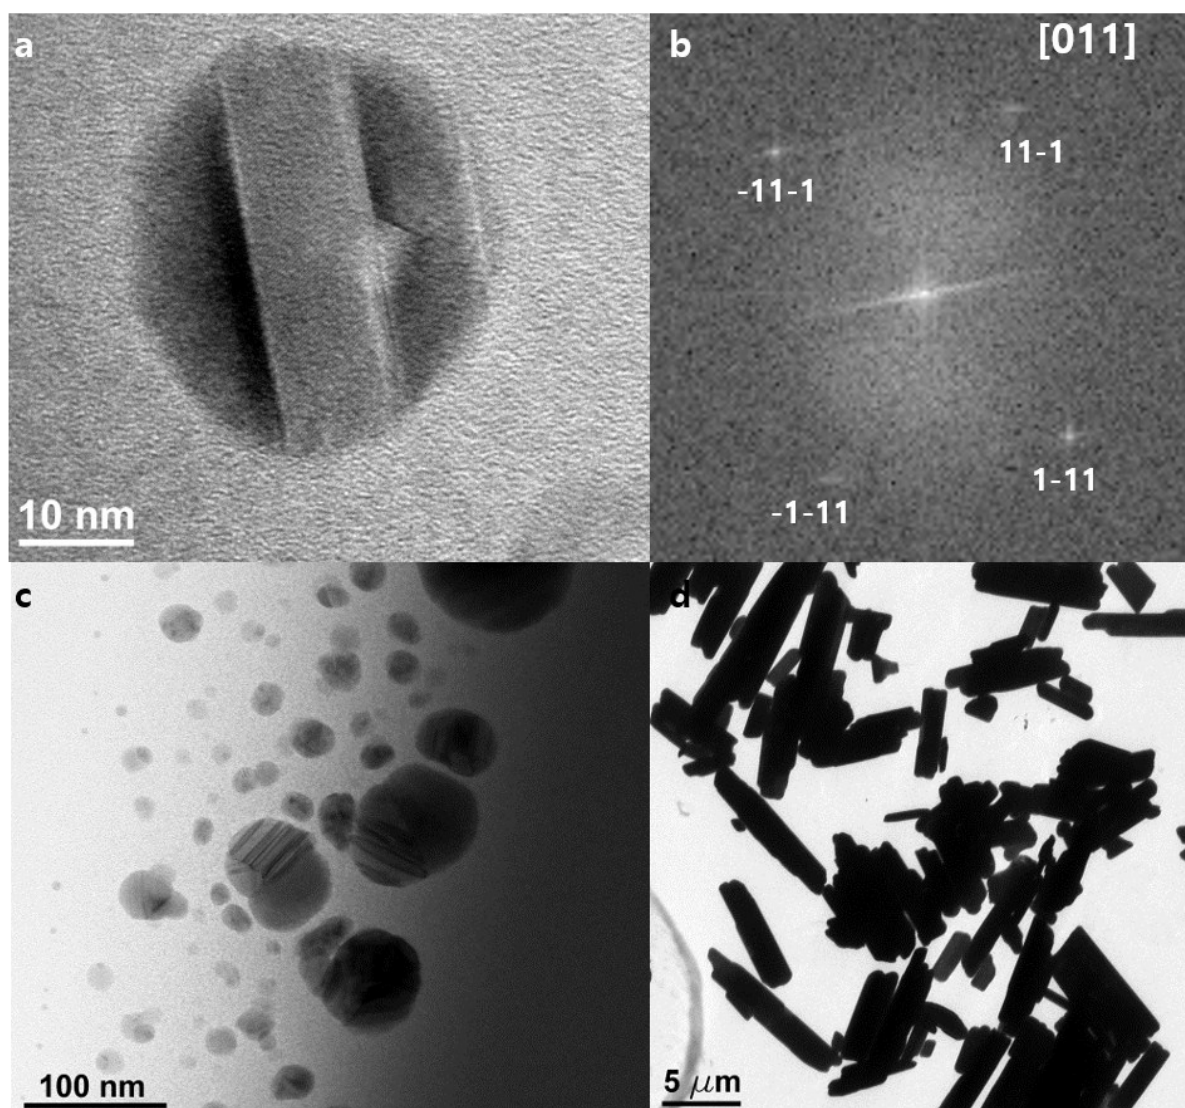

**Fig. S4** (a), (c) TEM images of nanoparticles imbedded in the rods prepared with Pluronic L-64 copolymers (17.9% aqueous,  $M_n \sim 2,900$ ). (b) SAED pattern of the TEM image in (a). (d) TEM image of the self-assembled rods.

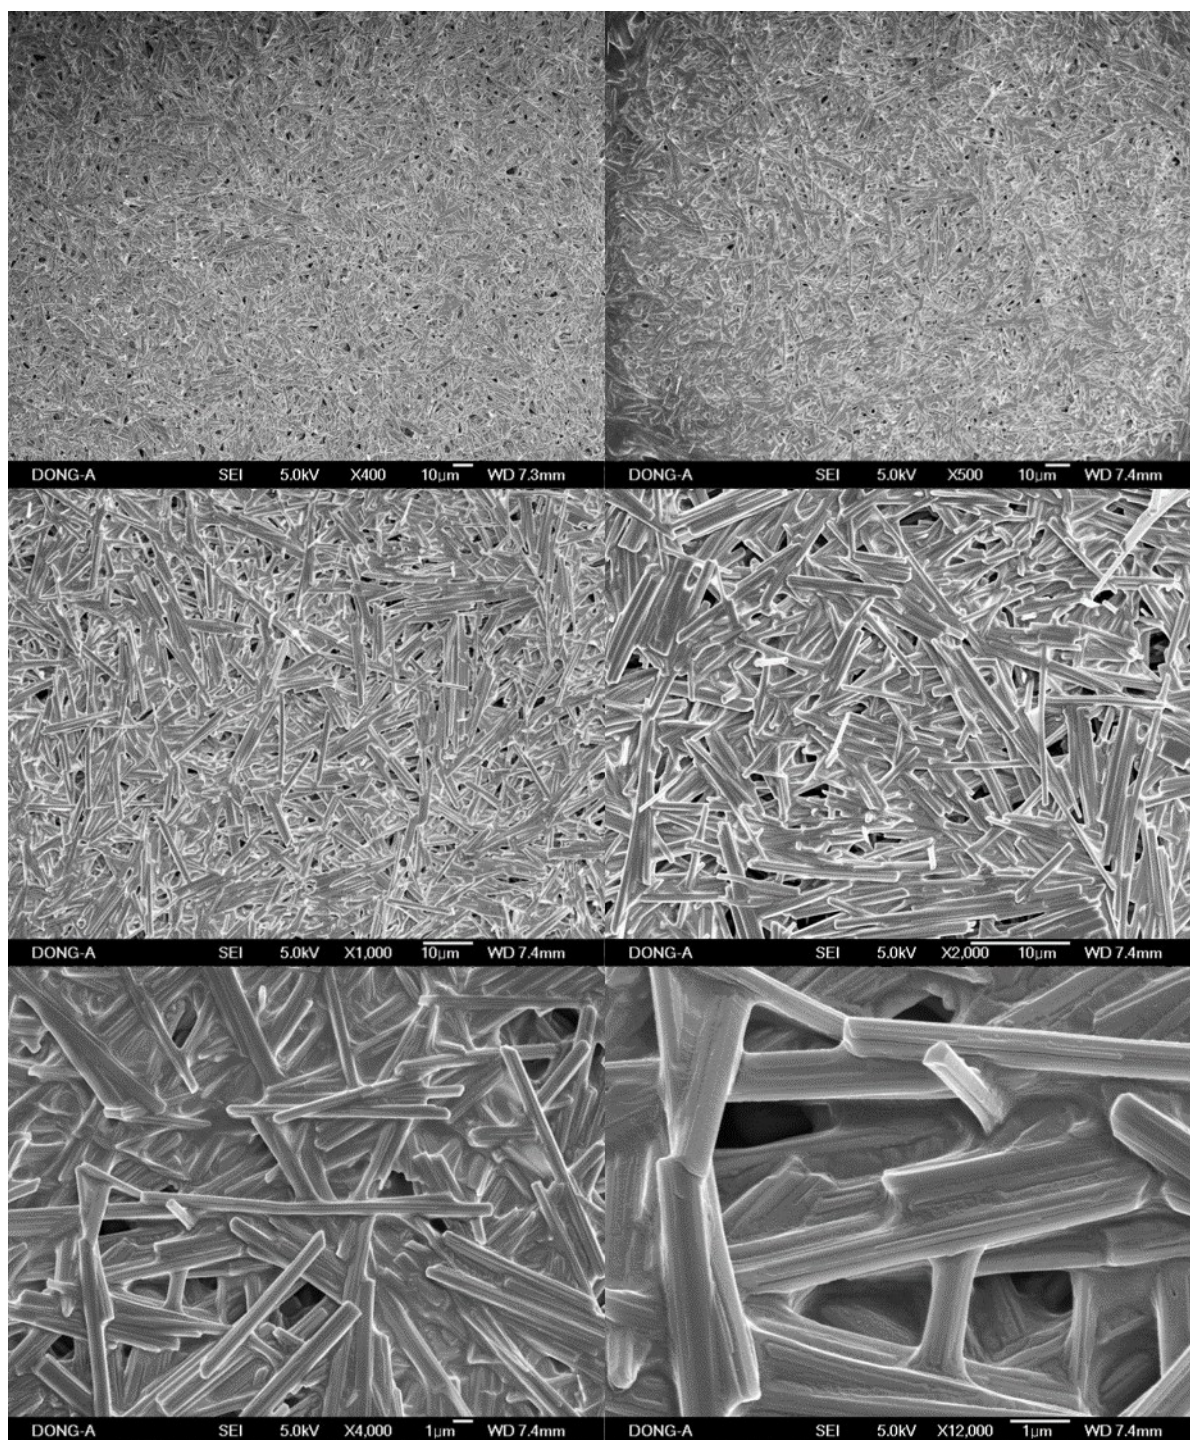

**Fig. S5** SEM images of different magnification of the self-assembled rods prepared with Pluronic P-123 copolymers (17.9% aqueous, Mn~5,800).

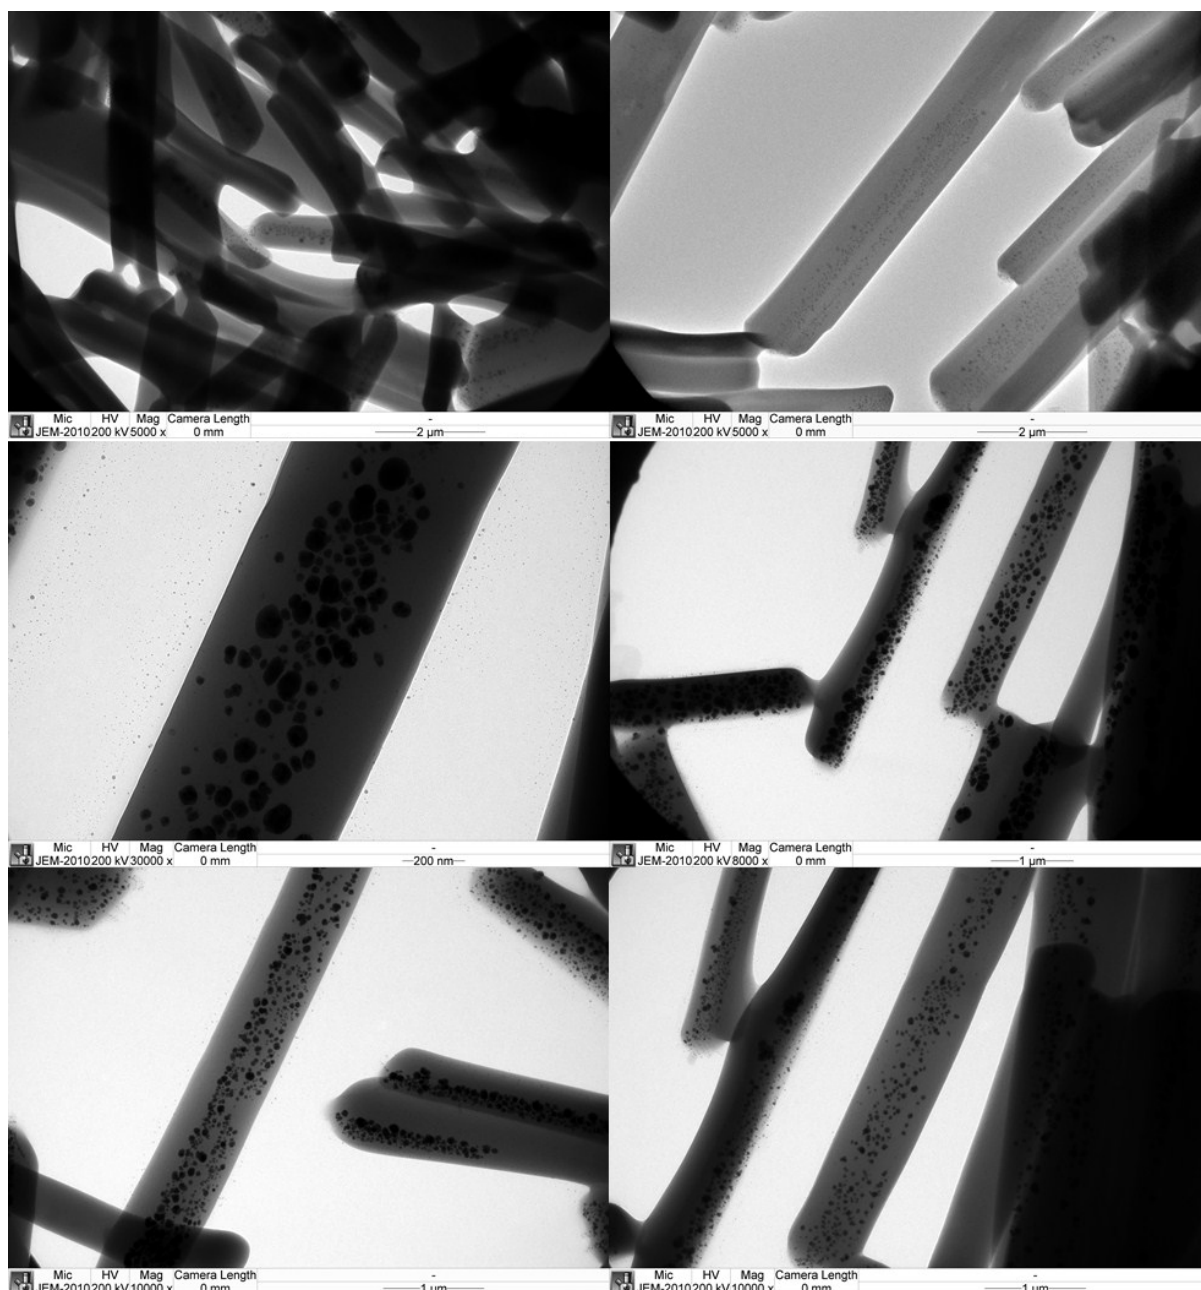

**Fig. S6** TEM images of different magnification of the self-assembled rods prepared with Pluronic P-123 copolymers (17.9% aqueous,  $M_n \sim 5,800$ ).

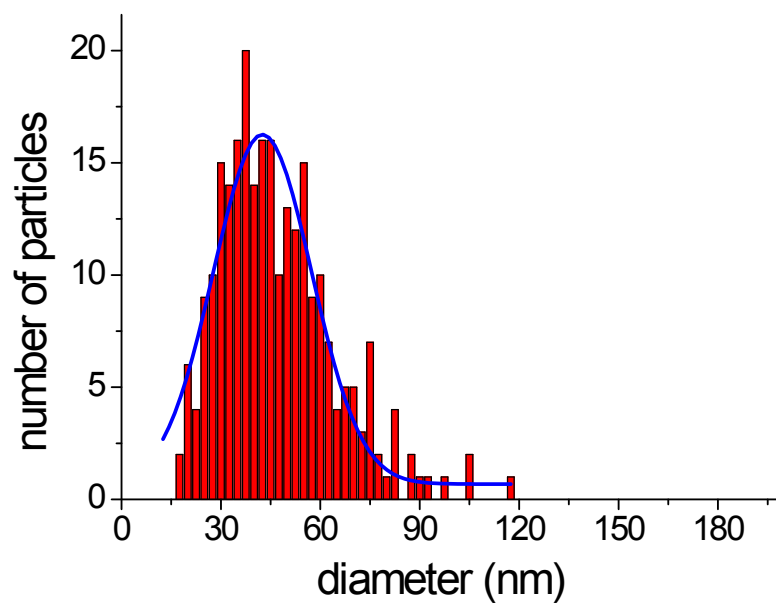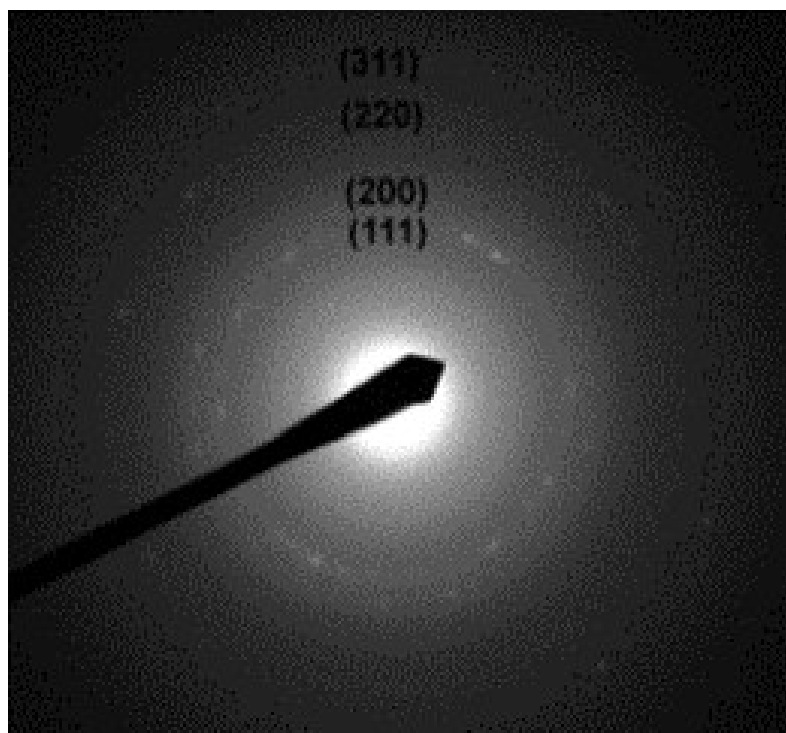

**Fig. S7** (top) Size distribution and (bottom) SAED pattern of nanoparticles that are imbedded in the rods. The rods were prepared with Pluronic P-123 copolymers (17.9% aqueous,  $M_n \sim 5,800$ ).

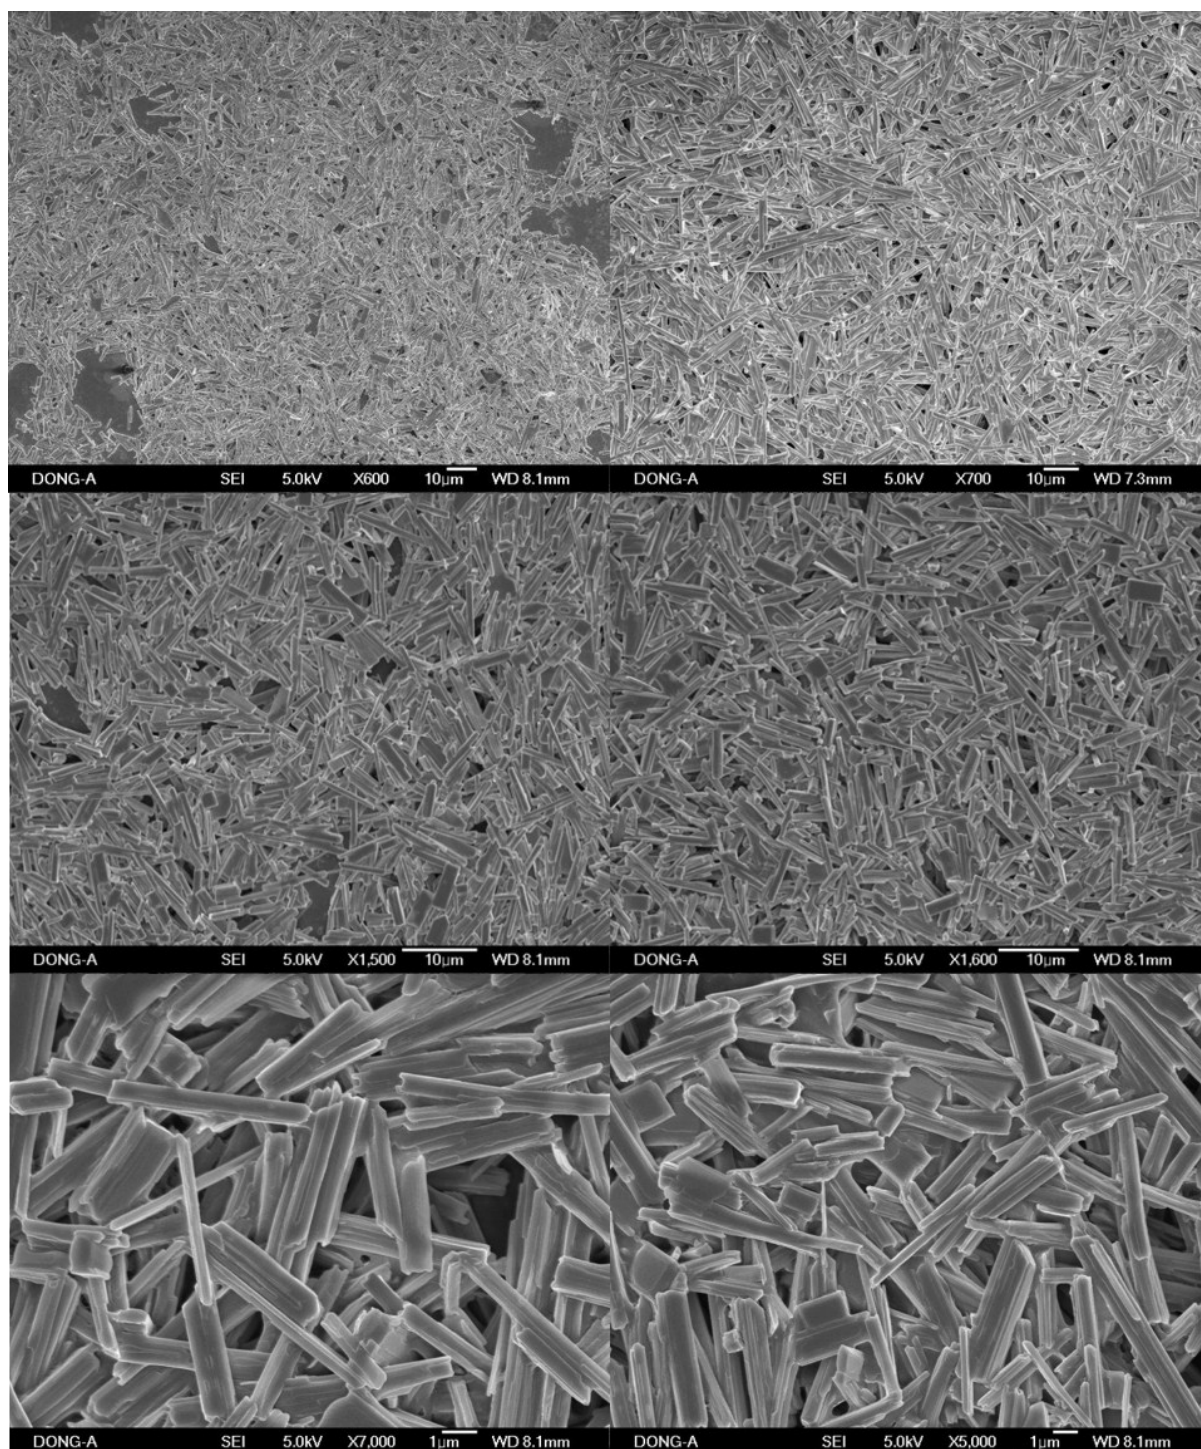

**Fig. S8** SEM images of different magnification of the self-assembled rods prepared with Pluronic F-108 copolymers (17.9% aqueous,  $M_n \sim 14,600$ ).

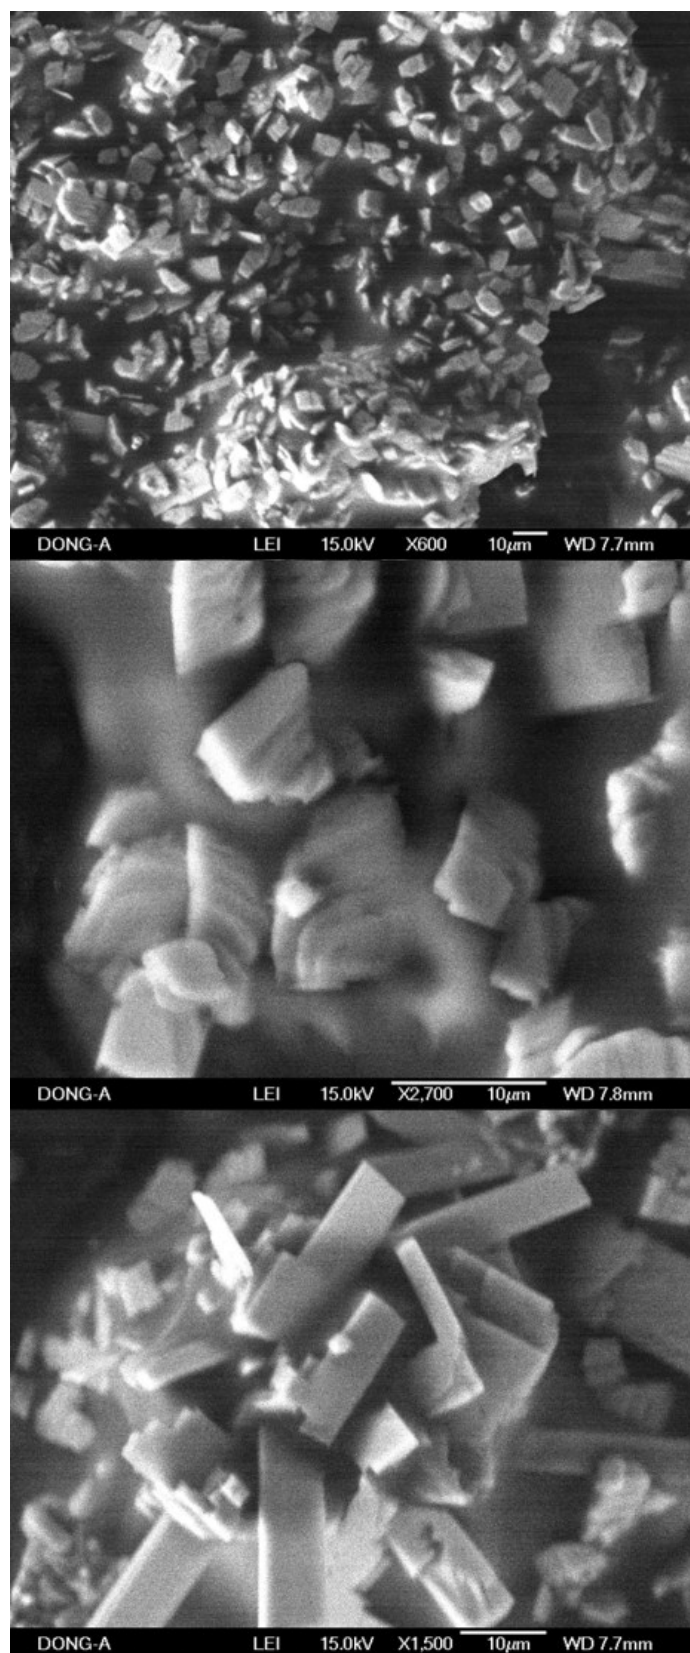

**Fig. S9** SEM images of different magnification of the self-assembled rods prepared with Pluronic L-31 copolymers (35.7% aqueous,  $M_n \sim 1,100$ ).

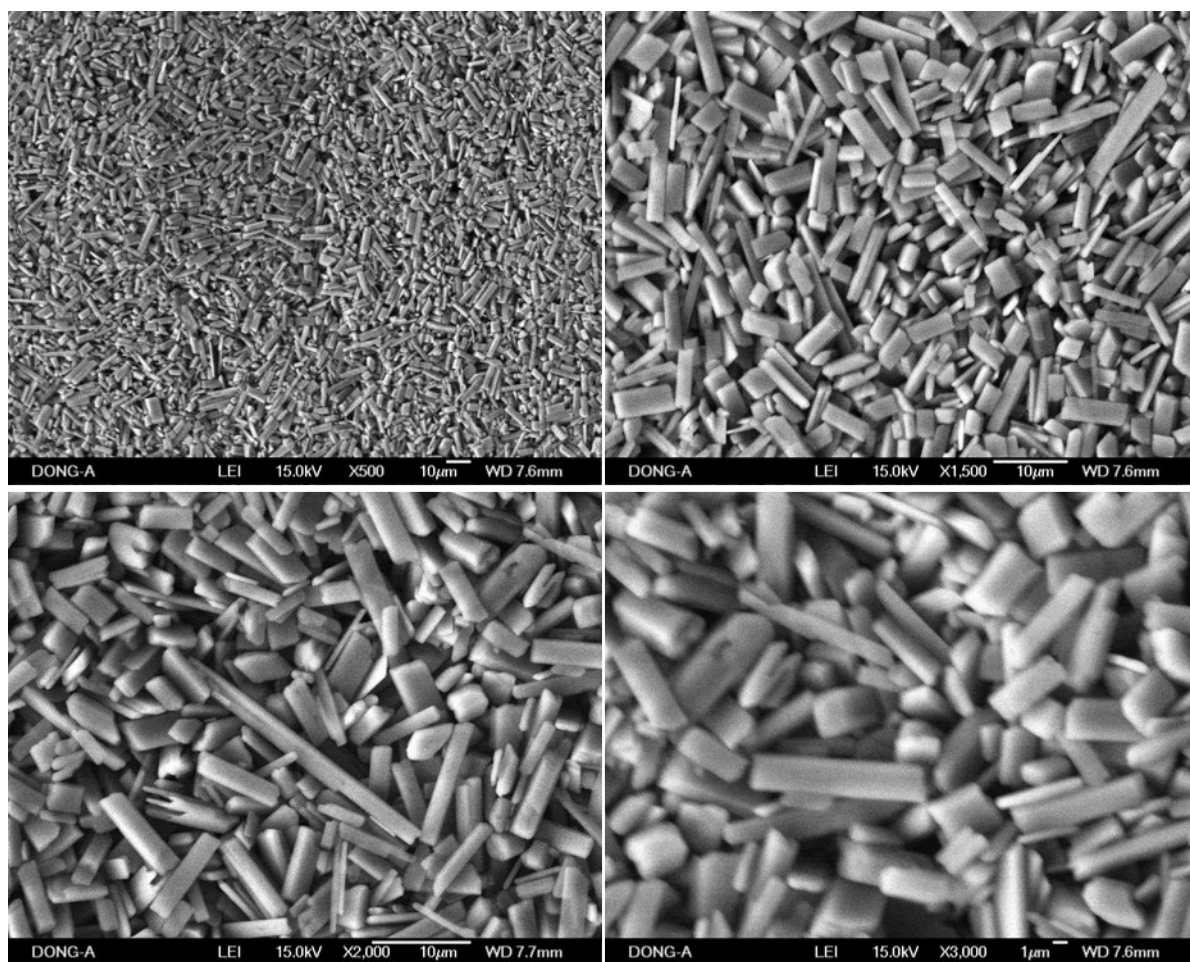

**Fig. S10** SEM images of different magnification of the self-assembled rods prepared with Pluronic L-64 copolymers (35.7% aqueous,  $M_n \sim 2,900$ ).

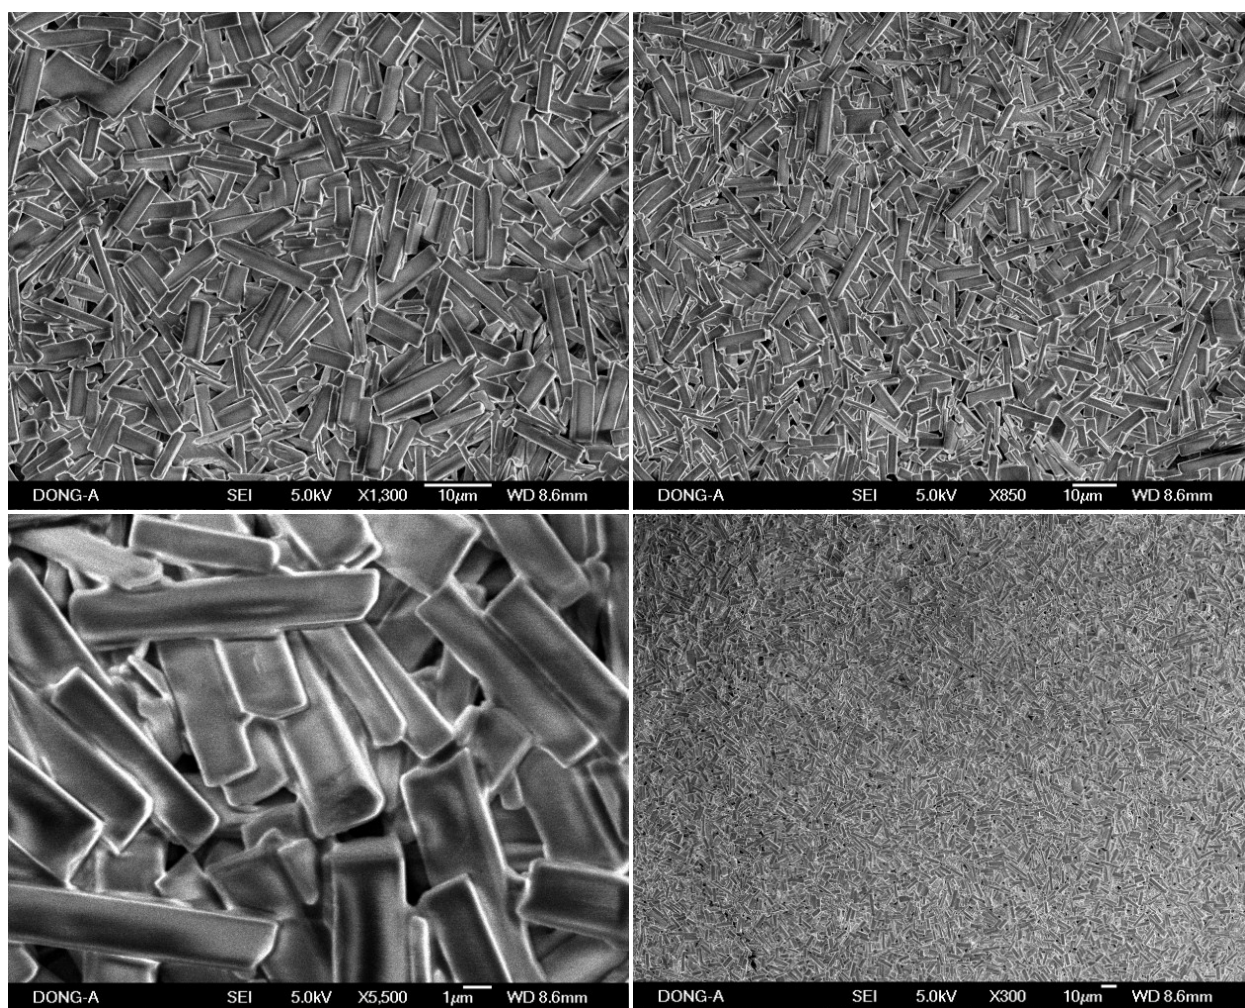

**Fig. S11** SEM images of different magnification of the self-assembled rods prepared with Pluronic L-64 copolymers (17.9% aqueous,  $M_n \sim 1,100$ ) in the absence of ascorbic acid.

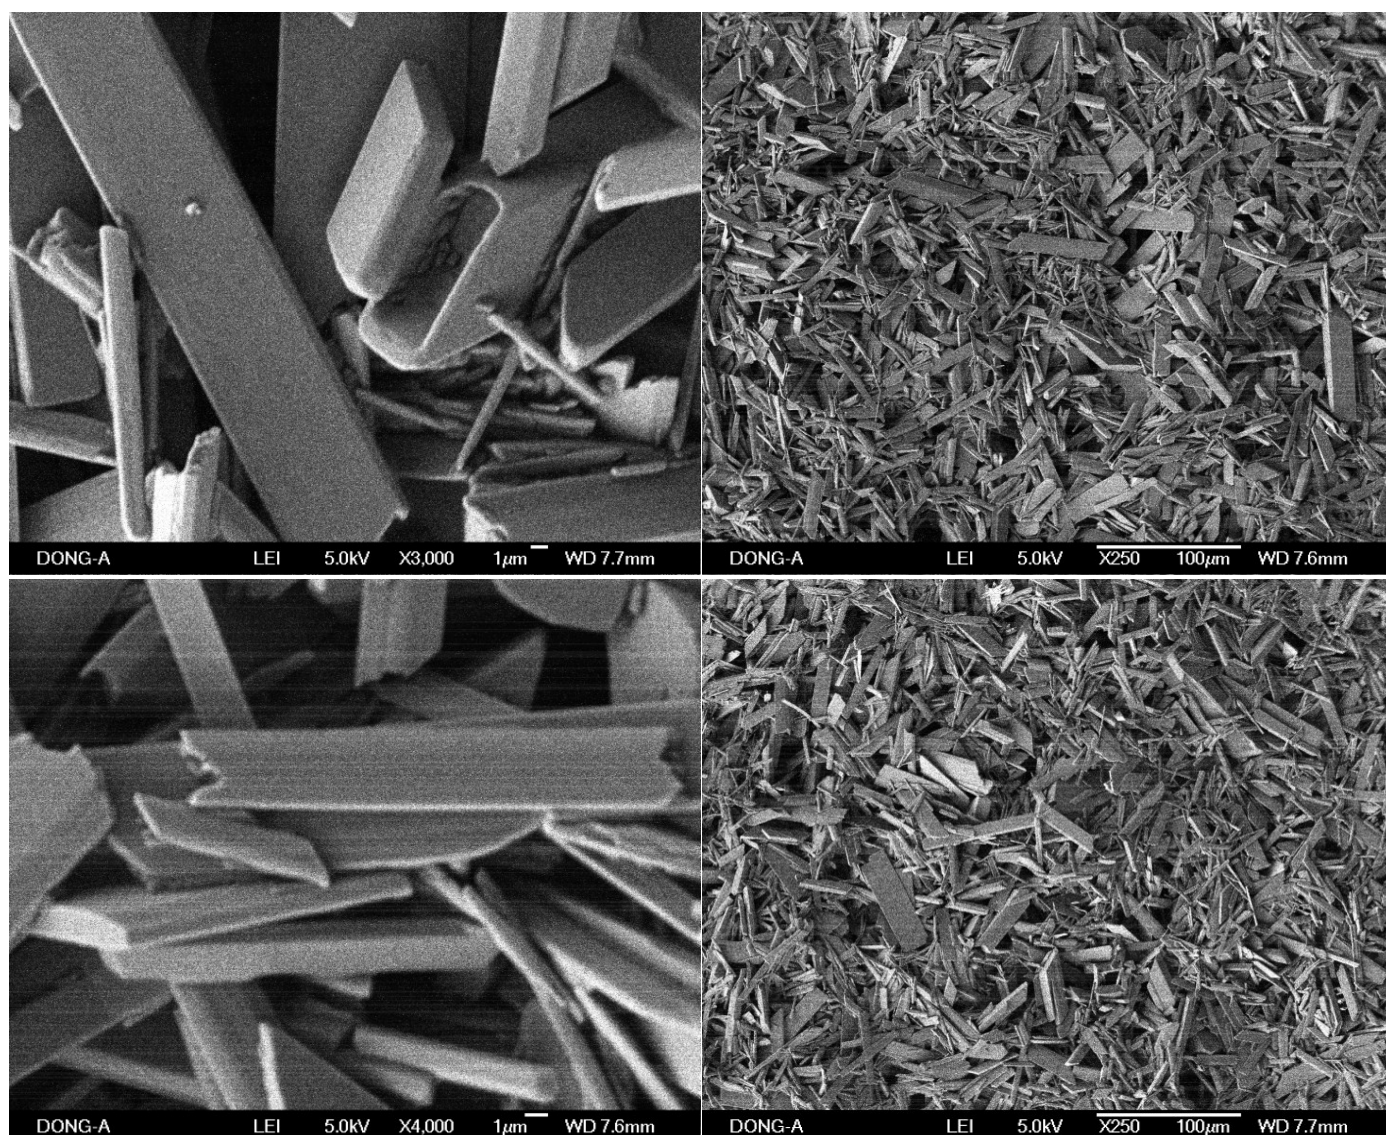

**Fig. S12** SEM images of different magnification of the self-assembled rods prepared with Pluronic L-64 copolymers (17.9% aqueous, Mn~2,900) in the absence of ascorbic acid.

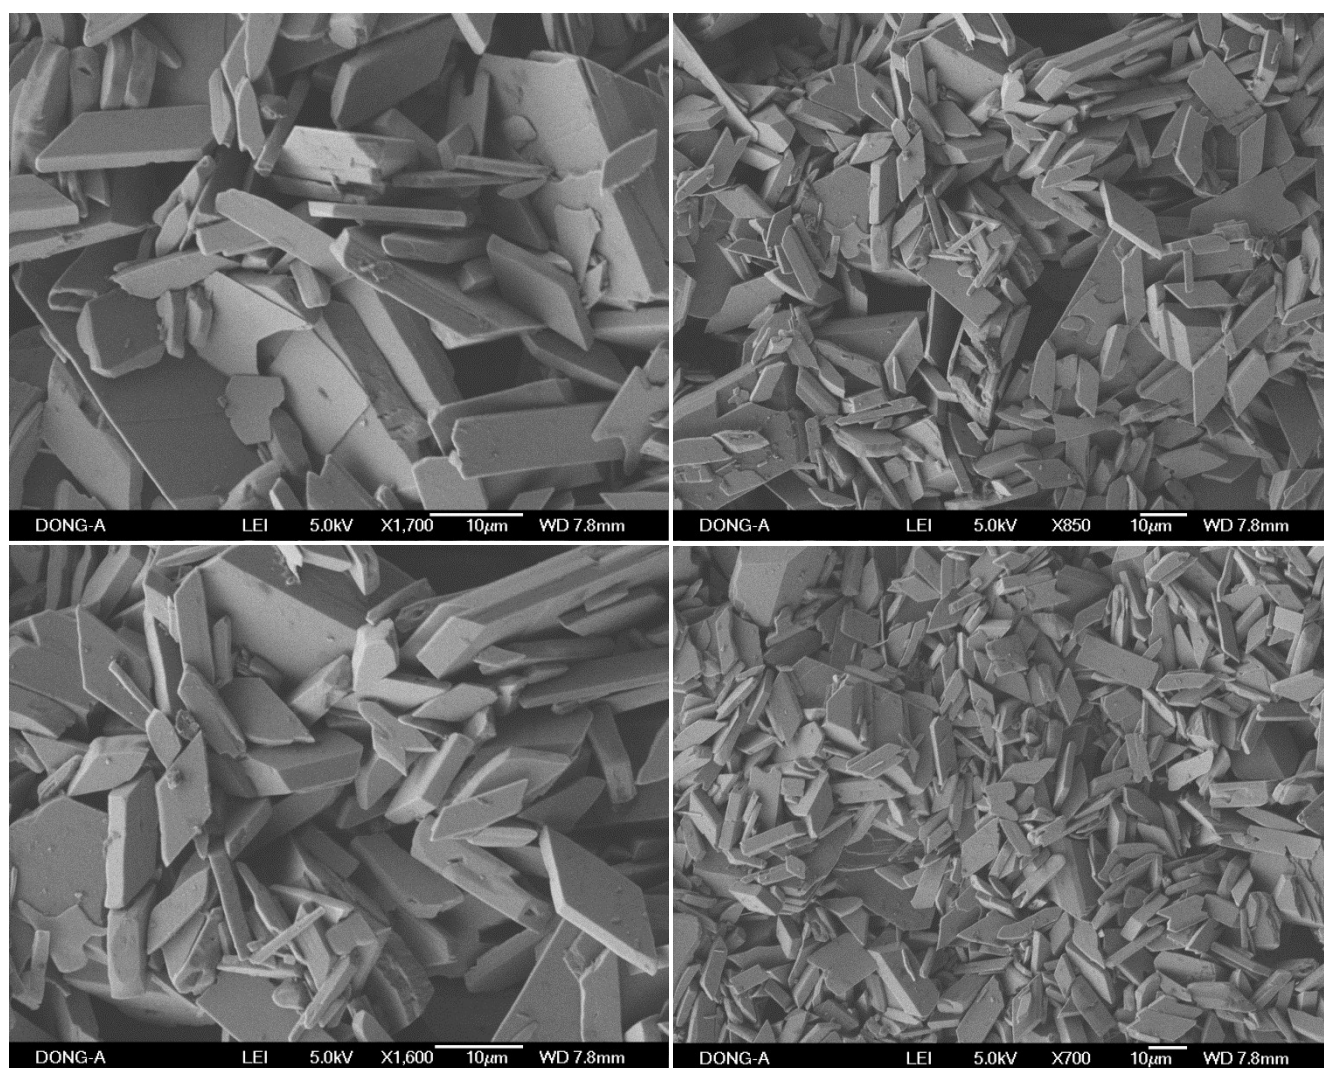

**Fig. S13** SEM images of different magnification of the self-assembled rods prepared with Pluronic P-123 copolymers (17.9% aqueous,  $M_n \sim 5,800$ ) in the absence of ascorbic acid.

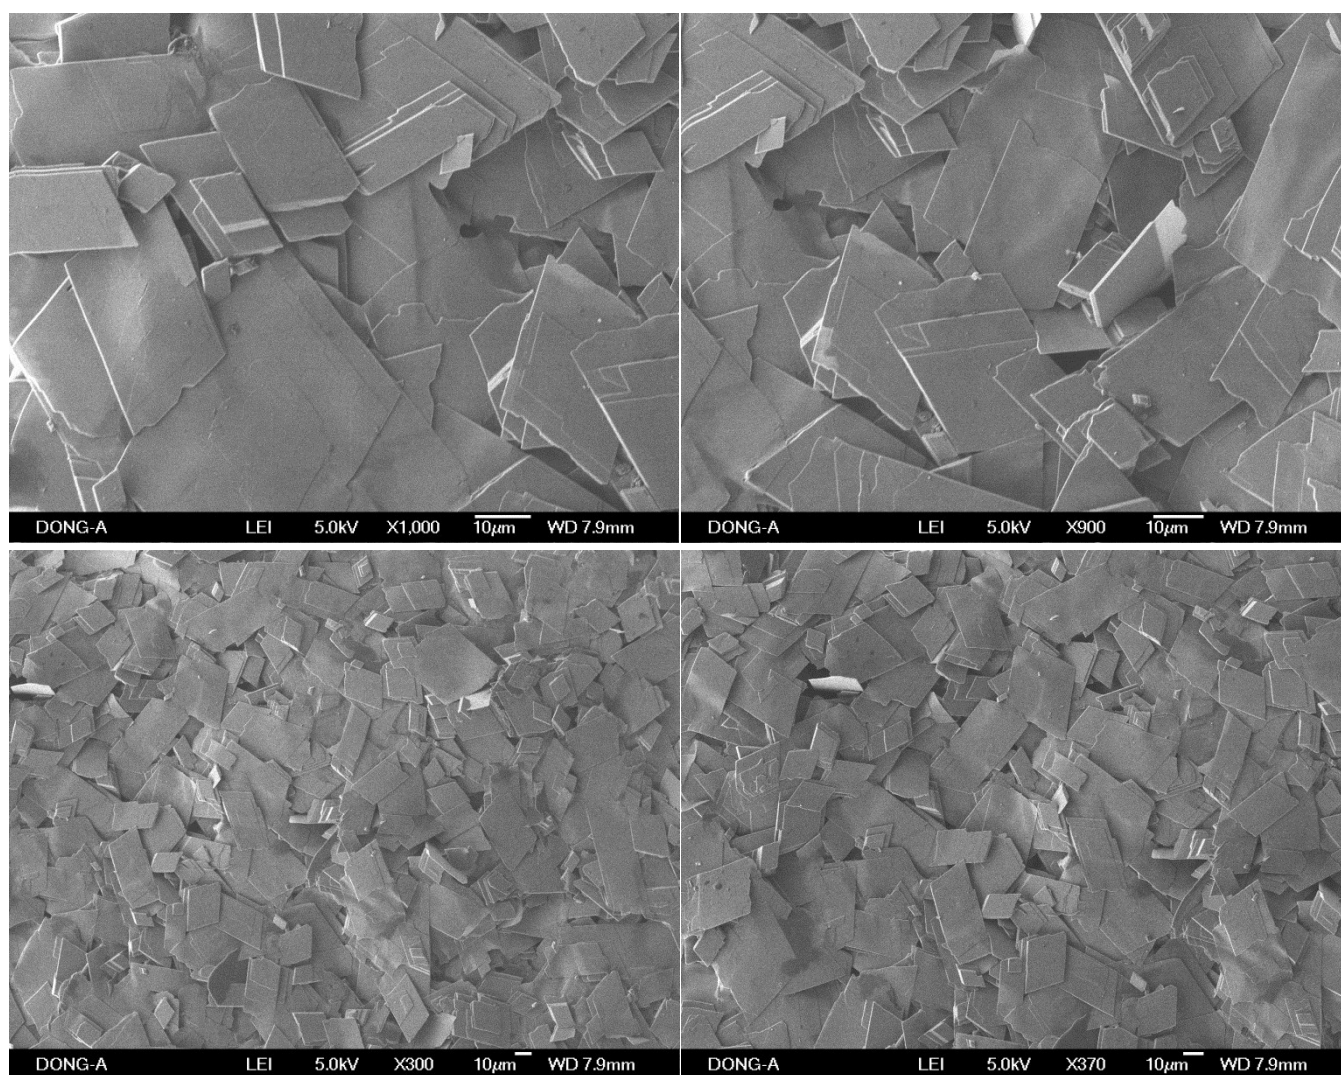

**Fig. S14** SEM images of different magnification of the self-assembled rods prepared with Pluronic F-108 copolymers (17.9% aqueous, Mn~14,600) in the absence of ascorbic acid.

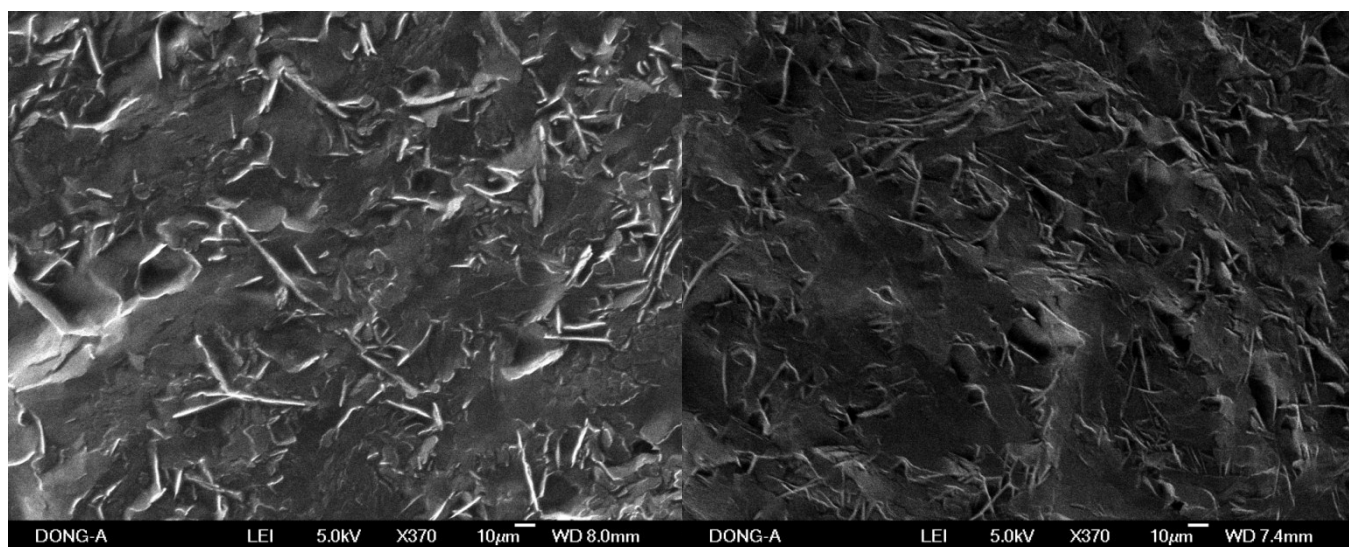

**Fig. S15** SEM images of the products which were obtained in the absence of Pluronic copolymers.

Table S1. Calculated  $d$ -spacings of the first and second peaks in the XRD patterns of self-assembled rods

| sample       | First peak<br>(degrees) | $d$ -spacing | Second peak<br>(degrees) | $d$ -spacing |
|--------------|-------------------------|--------------|--------------------------|--------------|
| CTAB         | 3.90                    | 22.6 Å       | 7.28                     | 12.1 Å       |
| L-31 (17.9%) | 4.43                    | 19.9 Å       | 8.82                     | 10.0 Å       |
| L-64 (17.9%) | 4.43                    | 19.9 Å       | 8.80                     | 10.0 Å       |
| L-31 (35.7%) | 4.41                    | 20.0 Å       | 8.78                     | 10.1 Å       |
| L-64 (35.7%) | 4.33                    | 20.4 Å       | 8.71                     | 10.1 Å       |
